# Supplementary material for: Severe liver trauma among pediatric patients in the Japan Trauma Registry
Source: HighWire-hosted journal article supplement (doi:10.1136/wjps-2021-000270), 2021-04-01
Supplement: wjps-2021-000270supp001_data_supplement.pdf [file wjps-2021-000270supp001_data_supplement.pdf]

Supplemental table 1 Details of the patients who had liver injury and additional severe abdominal injury who underwent angioembolization

| Case | Age (y) | Cause of injury | Arrival sBP (mmHg) | Arrival HR (beats per min) | Liver OIS grades | Additional abdominal injury OIS grades or AIS | Additional significant torso injury                         |
|------|---------|-----------------|--------------------|----------------------------|------------------|-----------------------------------------------|-------------------------------------------------------------|
| 1    | 2       | TA              | 84                 | 179                        | V                | Spleen (IV)                                   | Hemothorax, rib fracture, pneumothorax, pulmonary contusion |
| 2    | 6       | Other blunt     | 95                 | 152                        | IV               | Retroperitoneal (3)                           | None                                                        |
| 3    | 7       | TA              | 73                 | 143                        | IV               | Kidney (III)                                  | Pulmonary contusion                                         |
| 4    | 7       | TA              | 98                 | 139                        | IV               | Spleen (IV)                                   | Pulmonary contusion                                         |
| 5    | 11      | Fall            | 105                | 125                        | V                | Minor abdominal artery (3)                    | Pneumothorax, hemothorax                                    |
| 6    | 13      | TA              | 90                 | 105                        | V                | Kidney (III)                                  | None                                                        |
| 7    | 14      | TA              | 110                | 141                        | III              | Spleen (III)                                  | None                                                        |
| 8    | 14      | TA              | 140                | 148                        | III              | Spleen (IV)                                   | Rib fractures, pulmonary contusion                          |

TA, traffic accident; sBP, systolic blood pressure; HR, heart rate; OIS, organ injury scale; AIS, abbreviated injury scale.
