# Supplementary material for: Severe liver trauma among pediatric patients in the Japan Trauma Registry
Source: HighWire-hosted journal article supplement (doi:10.1136/wjps-2021-000270), 2021-04-01
Supplement: wjps-2021-000270supp002_data_supplement.pdf [file wjps-2021-000270supp002_data_supplement.pdf]

Supplemental table 2 Literatures regarding utilization of angioembolization among pediatric patients with liver injury

| Author                            | Study design                                           | Inclusion                         | Number of patients                            | High grade liver injury (%) | AE (%)               | OM (%)            | Mortality (%)        |
|-----------------------------------|--------------------------------------------------------|-----------------------------------|-----------------------------------------------|-----------------------------|----------------------|-------------------|----------------------|
| Aoki M, et al                     | Multicentered retrospective observational study        | Liver injury whose OIS $\geq$ III | Liver injury (308)<br>ILI (135)<br>NILI (173) | 100<br>100<br>100           | 24<br>27<br>22       | 12<br>7.4<br>16   | 7.1<br>0.7<br>12     |
| Linnaus ME, et al <sup>4</sup>    | Multicentered prospective observational study          | All BLSI on CT                    | Liver injury (598)<br>ILI (156)<br>NILI (442) | 38<br>N.A.<br>N.A           | N.A.<br>N.A.<br>N.A. | 7.4<br>3.8<br>8.6 | N.A.<br>N.A.<br>N.A. |
| Dervan LA, et al <sup>6</sup>     | Singlecentered retrospective observational study       | All AOI                           | Liver injury (360)<br>ILI (144)<br>NILI (332) | 36.1*<br>35.3*<br>36.5*     | 0<br>0<br>0          | 8.0<br>4.9<br>12  | 5.3<br>0<br>7.5      |
| Swendiman RA, et al <sup>10</sup> | Multicentered retrospective observational study (NTDB) | All isolated AOI                  | ILI (4,549)                                   | N.A.                        | 1.2                  | N.A               | 0.5                  |

AE, angioembolization; OM, operative management; OIS, organinjury scale; ILI, isolated liver injury; NILI, non-isolated liver injury; BLSI, blunt

liver splenic injury; AOI, abdominal organ injury; N.A., not applicable.
